# Supplementary material for: Development and Assessment of an Interpretable Machine Learning Triage Tool for Estimating Mortality After Emergency Admissions
Source: PubMed Central journal article supplement (PMC8397930; doi:10.1001/jamanetworkopen.2021.18467), 2021-08-27
Supplement: jamanetwopen-e2118467-s001.pdf [file jamanetwopen-e2118467-s001.pdf]

## Supplementary Online Content

Xie F, Ong MEH, Liew JNMH, et al. Development and assessment of an interpretable machine learning triage tool for estimating mortality after emergency admissions. *JAMA Netw Open*. 2021;4(8):e2118467. doi:10.1001/jamanetworkopen.2021.18467

**eTable 1.** List of Candidate Variables and Their Definitions

**eTable 2.** Varying Cutoffs of Predicted Risk Based on the SERP-30d, MEWS, NEWS, CART, RAPS, and REMS, the Proportion of Patients Stratified for 30-Day Mortality, and the Corresponding Sensitivity, Specificity, Positive and Negative Predictive Values on the Testing Cohort

**eTable 3.** Varying Cutoffs of Predicted Risk Based on the SERP-2d, SERP-7d, SERP-30d, MEWS, NEWS, CART, RAPS, and REMS, the Proportion of Patients Stratified for 2-Day Mortality, and the Corresponding Sensitivity and Specificity on the Testing Cohort

**eFigure 1.** Flowchart of the AutoScore Framework

**eFigure 2.** Parsimony Plot of the Number of Variables Versus AUC Values for (A) SERP-2d, (B) SERP-7d, and (C) SERP-30d on the Validation Cohort

**eFigure 3.** Number of Cases Versus Score Value on the Testing Cohort for (A) SERP-2d and (B) SERP-30d

**eFigure 4.** Observed Mortality Rate Versus Score Value on the Testing Cohort for (A) SERP-2d and (B) SERP-30d

**eMethods.** Description of the AutoScore Method

This supplementary material has been provided by the authors to give readers additional information about their work.

**eTable 1.** List of Candidate Variables and Their Definitions

| Candidate Variable Name                 | Definition                                                                                                                                                                                           |
|-----------------------------------------|------------------------------------------------------------------------------------------------------------------------------------------------------------------------------------------------------|
| Demographics & Administrative           |                                                                                                                                                                                                      |
| Age                                     | Age in years, specific to the index emergency admission                                                                                                                                              |
| Gender                                  | Gender identity as identified in official patient identification documents                                                                                                                           |
| Day of week                             | Days of the week, classified either as Monday, midweek (Tuesday, Wednesday, Thursday), Friday, or weekend (Saturday, Sunday)                                                                         |
| Shift time                              | 8-hour shift times ranging 08:00 to 16:00, 16:00 to 24:00, and 24:00 to 8:00                                                                                                                         |
| Medical history in the preceding year   |                                                                                                                                                                                                      |
| Count of emergency admissions last year | Total number of unique hospital admissions from the ED within a time period of one year from the index emergency admission                                                                           |
| Count of surgeries last year            | Total number of in-hospital surgeries within a time period of one year from the index emergency admission                                                                                            |
| Count of ICU admissions last year       | The total number of Intensive Care Unit (ICU) admissions within a time period of one year from the index emergency admission                                                                         |
| Count of HD admissions last year        | The total number of High Dependency (HD) admissions within a time period of one year from the index emergency admission                                                                              |
| Clinical data                           |                                                                                                                                                                                                      |
| Pulse                                   | The first measurement of the number of heart beats per minute during the index presentation to the ED. Typically electronically obtained during automated blood pressure cuff measurement.           |
| Respiration                             | The first measurement of the number of breaths taken per minute during the index presentation to the ED. Typically visually obtained by an experienced triage nurse in most circumstances.           |
| SpO <sub>2</sub>                        | The first measurement of the peripheral capillary oxygen percentage saturation during the index presentation to the ED. Typically electronically obtained using a portable fingertip pulse oximeter. |
| Diastolic BP                            | The first measurement of the diastolic blood pressure (BP) during the index presentation to the ED. Typically electronically obtained during automated blood pressure cuff measurement.              |

|                                                                                                                                                                                                                                                                                         |                                                                                                                                                                                                                        |
|-----------------------------------------------------------------------------------------------------------------------------------------------------------------------------------------------------------------------------------------------------------------------------------------|------------------------------------------------------------------------------------------------------------------------------------------------------------------------------------------------------------------------|
| Systolic BP                                                                                                                                                                                                                                                                             | The first measurement of the systolic blood pressure (BP) during the index presentation to the ED. Typically electronically obtained during automated blood pressure cuff measurement.                                 |
| Comorbidities (ICD-9 and ICD-10 codes were extracted from patient medical records in the preceding five years and matched to their corresponding comorbidities based on prior work by Quan et. al. Comorbidity was deemed to be absent if the representative codes were not identified) |                                                                                                                                                                                                                        |
| Myocardial infarction                                                                                                                                                                                                                                                                   | ICD-9-CM: 410.x, 412.x, or ICD-10: I21.x, I22.x, I25.2                                                                                                                                                                 |
| Congestive heart failure                                                                                                                                                                                                                                                                | ICD-9-CM: 428.x, or ICD-10: I09.9, I11.0, I13.0, I13.2, I25.5, I42.0, I42.5–I42.9, I43.x, I50.x, P29.0                                                                                                                 |
| Peripheral vascular disease                                                                                                                                                                                                                                                             | ICD-9-CM: 443.9, 441.x, 785.4, V43.4, or Procedure 38.48, or ICD-10: I70.x, I71.x, I73.1, I73.8, I73.9, I77.1, I79.0, I79.2, K55.1, K55.8, K55.9, Z95.8, Z95.9                                                         |
| Stroke                                                                                                                                                                                                                                                                                  | Eg cerebrovascular accident (CVA) or transient ischemic attack (TIA)<br>ICD-9-CM: 430.x–438.x, or ICD-10: G45.x, G46.x, H34.0, I60.x–I69.x                                                                             |
| Dementia                                                                                                                                                                                                                                                                                | ICD-9-CM: 490.x–505.x, 506.4, or ICD-10: F00.x–F03.x, F05.1, G30.x, G31.1                                                                                                                                              |
| Chronic pulmonary disease                                                                                                                                                                                                                                                               | ICD-9-CM: 290.x, or ICD-10: I27.8, I27.9, J40.x–J47.x, J60.x–J67.x, J68.4, J70.1, J70.3                                                                                                                                |
| Rheumatoid disease                                                                                                                                                                                                                                                                      | ICD-9-CM: 710.0, 710.1, 710.4, 714.0–714.2, 714.81, 725.x, or ICD-10: M05.x, M06.x, M31.5, M32.x–M34.x, M35.1, M35.3, M36.0                                                                                            |
| Peptic ulcer disease                                                                                                                                                                                                                                                                    | ICD-9-CM: 531.x–534.x, or ICD-10: K25.x–K28.x                                                                                                                                                                          |
| Diabetes without chronic complications                                                                                                                                                                                                                                                  | ICD-9-CM: 250.0–250.3, 250.7, or ICD-10: E10.0, E10.1, E10.6, E10.8, E10.9, E11.0, E11.1, E11.6, E11.8, E11.9, E12.0, E12.1, E12.6, E12.8, E12.9, E13.0, E13.1, E13.6, E13.8, E13.9, E14.0, E14.1, E14.6, E14.8, E14.9 |
| Diabetes with complications                                                                                                                                                                                                                                                             | ICD-9-CM: 250.4–250.6, or ICD-10: E10.2–E10.5, E10.7, E11.2–E11.5, E11.7, E12.2–E12.5, E12.7, E13.2–E13.5, E13.7, E14.2–E14.5, E14.7                                                                                   |
| Hemiplegia or paraplegia                                                                                                                                                                                                                                                                | ICD-9-CM: 344.1, 342.x, or ICD-10: G04.1, G11.4, G80.1, G80.2, G81.x, G82.x, G83.0–G83.4, G83.9                                                                                                                        |
| Renal disease                                                                                                                                                                                                                                                                           | ICD-9-CM: 582.x, 583–583.7, 585.x, 586.x, 588.x, or ICD-10: I12.0, I13.1, N03.2–N03.7, N05.2–N05.7, N18.x, N19.x, N25.0, Z49.0–Z49.2, Z94.0, Z99.2                                                                     |

|                                                                        |                                                                                                                                                                      |
|------------------------------------------------------------------------|----------------------------------------------------------------------------------------------------------------------------------------------------------------------|
| Local tumor, leukemia, or lymphoma (except malignant neoplasm of skin) | ICD-9-CM: 140.x–172.x, 174.x.–195.8, 200.x–208.x, or ICD-10: C00.x–C26.x, C30.x–C34.x, C37.x–C41.x, C43.x, C45.x–C58.x, C60.x–C76.x, C81.x–C85.x, C88.x, C90.x–C97.x |
| Metastatic solid tumor                                                 | ICD-9-CM:196.x–199.1, or ICD-10:: C77.x–C80.x                                                                                                                        |
| Mild liver disease                                                     | ICD-9-CM: 571.2, 571.4–571.6, or ICD-10: B18.x, K70.0–K70.3, K70.9, K71.3–K71.5, K71.7, K73.x, K74.x, K76.0, K76.2–K76.4, K76.8, K76.9, Z94.4                        |
| Severe liver disease                                                   | ICD-9-CM: 456.0–456.21, 572.2–572.8, or ICD-10: I85.0, I85.9, I86.4, I98.2, K70.4, K71.1, K72.1, K72.9, K76.5, K76.6, K76.7                                          |
| Mortality Outcomes                                                     |                                                                                                                                                                      |
| Inpatient Mortality                                                    | A clinically certified death of an admitted patient that happened during the in-patient hospital stay                                                                |
| 2-day mortality                                                        | A clinically certified death of an admitted patient that happened 48 hours after emergency admission                                                                 |
| 3-day mortality                                                        | A clinically certified death of an admitted patient that happened 72 hours after emergency admission                                                                 |
| 7-day mortality                                                        | A clinically certified death of an admitted patient that happened seven days after emergency admission                                                               |
| 30-day mortality                                                       | A clinically certified death of an admitted patient that happened 30 days after emergency admission                                                                  |

ICD-9-CM: International Classification of Diseases, Ninth Revision, Clinical Modification

ICD-10: The International Statistical Classification of Diseases and Related Health Problems  
10th Revision

**eTable 2.** Varying Cutoffs of Predicted Risk Based on the SERP-30d, MEWS, NEWS, CART, RAPS, and REMS, the Proportion of Patients Stratified for 30-Day Mortality, and the Corresponding Sensitivity, Specificity, Positive and Negative Predictive Values on the Testing Cohort

| Score cut-off    | Predicted Risk | Percentage of patients (%) | Sensitivity (95% CI) | Specificity (95% CI) | PPV (95% CI)       | NPV (95% CI)       |
|------------------|----------------|----------------------------|----------------------|----------------------|--------------------|--------------------|
| <b>SERP-30d</b>  |                |                            |                      |                      |                    |                    |
| ≥15              | ≥1%            | 88                         | 99.1% (98.7-99.5%)   | 12.2% (11.9-12.5%)   | 6.1% (6.1-6.1%)    | 99.6% (99.4-99.8%) |
| ≥26 <sup>a</sup> | ≥5%            | 27                         | 74.6% (72.9-76.5%)   | 75.8% (75.4-76.2%)   | 15% (14.6-15.4%)   | 98.1% (98.3-98.3%) |
| ≥31              | ≥10%           | 14                         | 56.5% (54.4-58.5%)   | 88% (87.7-88.3%)     | 21.2% (20.4-21.9%) | 97.2% (97.1-97.4%) |
| ≥37              | ≥20%           | 5                          | 30.8% (29.3-32.8%)   | 96.5% (96.3-96.6%)   | 33.2% (31.5-35%)   | 96.1% (96.2-96.2%) |
| ≥46              | ≥50%           | 1                          | 6.1% (5.2-7.1%)      | 99.7% (99.7-99.8%)   | 55.3% (49.4-61%)   | 94.9% (94.8-94.9%) |
| <b>MEWS</b>      |                |                            |                      |                      |                    |                    |
| ≥2 <sup>a</sup>  | ≥5%            | 31                         | 59% (57.6-61%)       | 70.3% (69.9-70.8%)   | 10.2% (9.9-10.6%)  | 96.8% (96.6-96.9%) |
| ≥4               | ≥10%           | 7                          | 23.5% (21.7-25.3%)   | 93.5% (93.3-93.7%)   | 17.1% (15.9-18.4%) | 95.5% (95.4-95.6%) |
| ≥6               | ≥20%           | 1                          | 5.6% (4.7-6.5%)      | 98.8% (98.7-98.9%)   | 21.6% (18.3-24.9%) | 94.8% (94.8-94.9%) |
| ≥9               | ≥50%           | 0                          | 0.4% (0.2-0.7%)      | 100% (99.9-100%)     | 33.3% (16.7-51.5%) | 94.6% (94.6-94.6%) |
| <b>NEWS</b>      |                |                            |                      |                      |                    |                    |
| ≥2 <sup>a</sup>  | ≥5%            | 33                         | 63.5% (61.4-65.4%)   | 69% (68.6-69.5%)     | 10.5% (10.2-10.8%) | 97.1% (96.9-97.2%) |
| ≥4               | ≥10%           | 11                         | 35.2% (33.3-37.1%)   | 90.7% (90.4-91%)     | 17.8% (16.9-18.7%) | 96.1% (96.2-96.2%) |
| ≥7               | ≥20%           | 2                          | 10.9% (9.7-12.2%)    | 98.6% (98.4-98.7%)   | 30% (27.3-32.9%)   | 95.1% (95.1-95.1%) |
| ≥10              | ≥50%           | 0                          | 2.3% (1.7-2.9%)      | 99.8% (99.7-99.8%)   | 37.7% (29.7-45.9%) | 94.7% (94.7-94.7%) |
| <b>CART</b>      |                |                            |                      |                      |                    |                    |
| ≥6 <sup>a</sup>  | ≥3.8%          | 52                         | 77.4% (75.6-79.1%)   | 49.9% (49.4-50.4%)   | 8.1% (7.9-8.3%)    | 97.5% (97.3-97.7%) |

|             |      |    |                    |                    |                    |                    |
|-------------|------|----|--------------------|--------------------|--------------------|--------------------|
| ≥9          | ≥5%  | 51 | 76% (74.2-77.7%)   | 50.8% (50.3-51.2%) | 8.1% (7.9-8.3%)    | 97.4% (97.2-97.6%) |
| ≥17         | ≥10% | 10 | 30.7% (28.8-32.6%) | 91.4% (91.1-91.7%) | 17% (16-17.9%)     | 95.8% (95.7-95.9%) |
| ≥27         | ≥20% | 2  | 8.1% (7-9.2%)      | 98.7% (98.6-98.8%) | 26.7% (23.5-29.7%) | 94.9% (94.9-95%)   |
| ≥43         | ≥50% | 0  | 1% (0.6-1.4%)      | 99.9% (99.8-99.9%) | 30.6% (20.5-40.9%) | 94.6% (94.6-94.7%) |
| <b>RAPS</b> |      |    |                    |                    |                    |                    |
| ≥1          | ≥5%  | 44 | 56.9% (54.9-59%)   | 56.3% (55.8-56.7%) | 6.9% (6.7-7.2%)    | 95.8% (95.6-96%)   |
| ≥5          | ≥10% | 2  | 6.8% (5.8-7.9%)    | 97.9% (97.8-98.1%) | 15.7% (13.6-18.1%) | 94.8% (94.8-94.9%) |
| ≥8          | ≥20% | 0  | 0.8% (0.5-1.2%)    | 99.9% (99.9-100%)  | 45.2% (30-60%)     | 94.6% (94.6-94.6%) |
| <b>REMS</b> |      |    |                    |                    |                    |                    |
| ≥6          | ≥5%  | 50 | 71.1% (69.2-73%)   | 51.7% (51.2-52.2%) | 7.8% (7.6-8%)      | 96.9% (96.7-97.1%) |
| ≥9          | ≥10% | 10 | 22.2% (20.6-24%)   | 90.8% (90.5-91.1%) | 12.2% (11.3-13.1%) | 95.3% (95.2-95.4%) |
| ≥13         | ≥20% | 0  | 3.1% (2.4-3.9%)    | 99.7% (99.6-99.7%) | 34.8% (28.1-41.1%) | 94.7% (94.7-94.8%) |
| ≥19         | ≥50% | 0  | 0.4% (0.2-0.6%)    | 100% (100-100%)    | 90.9% (66.7-100%)  | 94.6% (94.6-94.6%) |

SERP, Score for Emergency Risk Prediction; MEWS, Modified Early Warning Score; NEWS, National Early Warning Score; CART, Cardiac Arrest Risk Triage; RAPS, Rapid Acute Physiology Score; REMS, Rapid Emergency Medicine score.

<sup>a</sup> Optimal threshold, defined as the point nearest to the upper-left corner of the ROC curve

**eTable 3.** Varying Cutoffs of Predicted Risk Based on the SERP-2d, SERP-7d, SERP-30d, MEWS, NEWS, CART, RAPS, and REMS, the Proportion of Patients Stratified for 2-Day Mortality, and the Corresponding Sensitivity and Specificity on the Testing Cohort

| Predicted Risk  | Score cut-off    | Percentage of patients | Sensitivity (95% CI) | Specificity (95% CI) |
|-----------------|------------------|------------------------|----------------------|----------------------|
| <b>SERP-2d</b>  |                  |                        |                      |                      |
| ≥1%             | ≥27 <sup>a</sup> | 16                     | 68.5% (63.1-73.9%)   | 84.1% (83.7-84.5%)   |
| ≥5%             | ≥38              | 2                      | 21.7% (16.9-26.4%)   | 98.3% (98.2-98.4%)   |
| ≥10%            | ≥43              | 1                      | 9.8% (6.4-13.2%)     | 99.5% (99.5-99.6%)   |
| ≥20%            | ≥48              | 0                      | 4.1% (2-6.4%)        | 99.9% (99.8-99.9%)   |
| <b>SERP-7d</b>  |                  |                        |                      |                      |
| ≥0.7%           | ≥30 <sup>a</sup> | 22                     | 72.5% (67.5-77.3%)   | 78% (77.6-78.4%)     |
| ≥1%             | ≥32              | 14                     | 63.4% (58-68.8%)     | 85.9% (85.5-86.2%)   |
| ≥5%             | ≥43              | 1                      | 18.3% (13.9-22.7%)   | 98.7% (98.6-98.8%)   |
| ≥10%            | ≥49              | 0                      | 3.1% (1.4-5.1%)      | 99.7% (99.7-99.8%)   |
| ≥20%            | ≥55              | 0                      | 1% (0-2.4%)          | 100% (100-100%)      |
| <b>SERP-30d</b> |                  |                        |                      |                      |
| ≥0.6%           | ≥27 <sup>a</sup> | 25                     | 76.3% (71.5-81%)     | 75.5% (75.1-75.9%)   |
| ≥1%             | ≥30              | 17                     | 63.4% (58-68.5%)     | 83.8% (83.5-84.1%)   |
| ≥5%             | ≥42              | 2                      | 23.4% (18.6-28.1%)   | 98% (97.9-98.2%)     |
| ≥10%            | ≥48              | 0                      | 10.2% (6.8-13.6%)    | 99.6% (99.5-99.7%)   |
| ≥20%            | ≥54              | 0                      | 1.4% (0.3-2.7%)      | 99.9% (99.9-100%)    |
| <b>MEWS</b>     |                  |                        |                      |                      |
| ≥0.5%           | ≥2 <sup>a</sup>  | 31                     | 75.3% (70.2-80%)     | 69.1% (68.7-69.5%)   |
| ≥1%             | ≥3               | 17                     | 56.9% (51.2-62.7%)   | 82.9% (82.5-83.2%)   |
| ≥5%             | ≥6               | 1                      | 15.9% (11.9-20.3%)   | 98.7% (98.6-98.8%)   |
| ≥10%            | ≥8               | 0                      | 3.4% (1.7-5.8%)      | 99.8% (99.8-99.9%)   |
| ≥20%            | ≥9               | 0                      | 1.7% (0.3-3.4%)      | 99.9% (99.9-100%)    |
| ≥50%            | ≥11              | 0                      | 0.7% (0-1.7%)        | 100% (100-100%)      |
| <b>NEWS</b>     |                  |                        |                      |                      |
| ≥0.7%           | ≥3 <sup>a</sup>  | 19                     | 69.5% (64.4-74.6%)   | 81.1% (80.7-81.5%)   |
| ≥1%             | ≥4               | 11                     | 55.9% (50.2-61.7%)   | 89.6% (89.3-89.9%)   |
| ≥5%             | ≥8               | 1                      | 19.7% (15.3-24.1%)   | 99% (98.9-99.1%)     |
| ≥10%            | ≥9               | 1                      | 12.9% (9.2-16.6%)    | 99.5% (99.4-99.6%)   |
| ≥20%            | ≥11              | 0                      | 4.1% (2-6.4%)        | 99.9% (99.8-99.9%)   |
| ≥50%            | ≥14              | 0                      | 0% (0-0%)            | 100% (100-100%)      |
| <b>CART</b>     |                  |                        |                      |                      |
| ≥0.6%           | ≥10 <sup>a</sup> | 15                     | 59.3% (53.9-64.8%)   | 85.4% (85.1-85.7%)   |
| ≥1%             | ≥15              | 10                     | 51.2% (45.4-57%)     | 90% (89.8-90.3%)     |
| ≥5%             | ≥30              | 1                      | 14.6% (10.5-18.6%)   | 98.6% (98.5-98.8%)   |

|             |                 |    |                    |                    |
|-------------|-----------------|----|--------------------|--------------------|
| ≥10%        | ≥37             | 0  | 4.4% (2.4-7.1%)    | 99.6% (99.6-99.7%) |
| ≥20%        | ≥44             | 0  | 2% (0.7-3.7%)      | 99.8% (99.8-99.9%) |
| ≥50%        | ≥58             | 0  | 0% (0-0%)          | 100% (100-100%)    |
| <b>RAPS</b> |                 |    |                    |                    |
| ≥0.4%       | ≥1 <sup>a</sup> | 44 | 72.5% (67.5-77.6%) | 55.7% (55.2-56.2%) |
| ≥1%         | ≥3              | 12 | 39% (33.6-44.4%)   | 88.1% (87.8-88.4%) |
| ≥5%         | ≥7              | 0  | 5.1% (3.1-7.8%)    | 99.8% (99.8-99.8%) |
| ≥10%        | ≥8              | 0  | 3.4% (1.4-5.4%)    | 99.9% (99.9-100%)  |
| ≥20%        | ≥10             | 0  | 1.7% (0.3-3.4%)    | 100% (100-100%)    |
| ≥50%        | ≥13             | 0  | 0% (0-0%)          | 100% (100-100%)    |
| <b>REMS</b> |                 |    |                    |                    |
| ≥0.7%       | ≥7 <sup>a</sup> | 31 | 63.4% (58-69.2%)   | 69.3% (68.8-69.7%) |
| ≥1%         | ≥8              | 21 | 50.2% (44.4-55.9%) | 78.7% (78.3-79.1%) |
| ≥5%         | ≥13             | 0  | 7.8% (5.1-10.8%)   | 99.6% (99.5-99.6%) |
| ≥10%        | ≥15             | 0  | 3.1% (1.4-5.1%)    | 99.9% (99.9-99.9%) |
| ≥20%        | ≥18             | 0  | 1.4% (0.3-2.7%)    | 100% (100-100%)    |
| ≥50%        | ≥22             | 0  | 0.7% (0-1.7%)      | 100% (100-100%)    |

SERP, Score for Emergency Risk Prediction; MEWS, Modified Early Warning Score; NEWS, National Early Warning Score; CART, Cardiac Arrest Risk Triage; RAPS, Rapid Acute Physiology Score; REMS, Rapid Emergency Medicine score.

<sup>a</sup>Optimal threshold, defined as the point nearest to the upper-left corner of the ROC curve



**eFigure 1.** Flowchart of the AutoScore Framework

This figure was originally published in JMIR Medical Informatics (<http://medinform.jmir.org>) under CC-BY license: Xie F, Chakraborty B, Ong MEH, Goldstein BA, Liu N. AutoScore: A Machine Learning–Based Automatic Clinical Score Generator and Its Application to Mortality Prediction Using Electronic Health Records. JMIR Med Inform 2020;8(10):e21798. doi: 10.2196/21798

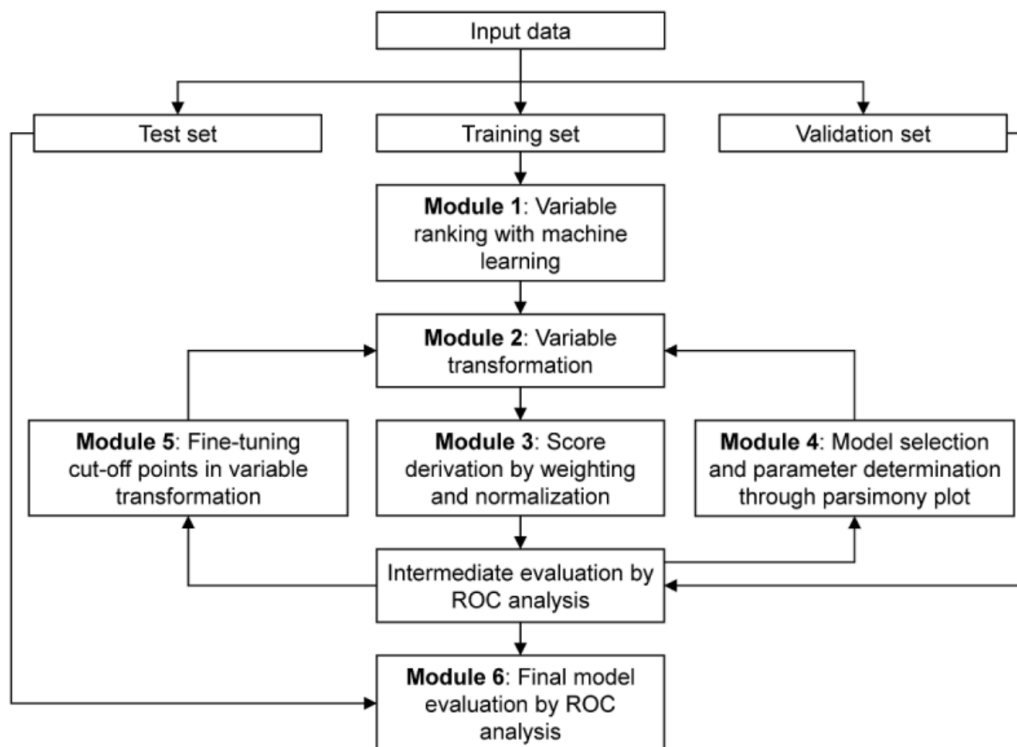

ROC: receiver operating characteristic.

**eFigure 2.** Parsimony Plot of the Number of Variables Versus AUC Values for (A) SERP-2d, (B) SERP-7d and (C) SERP-30d on the Validation Cohort

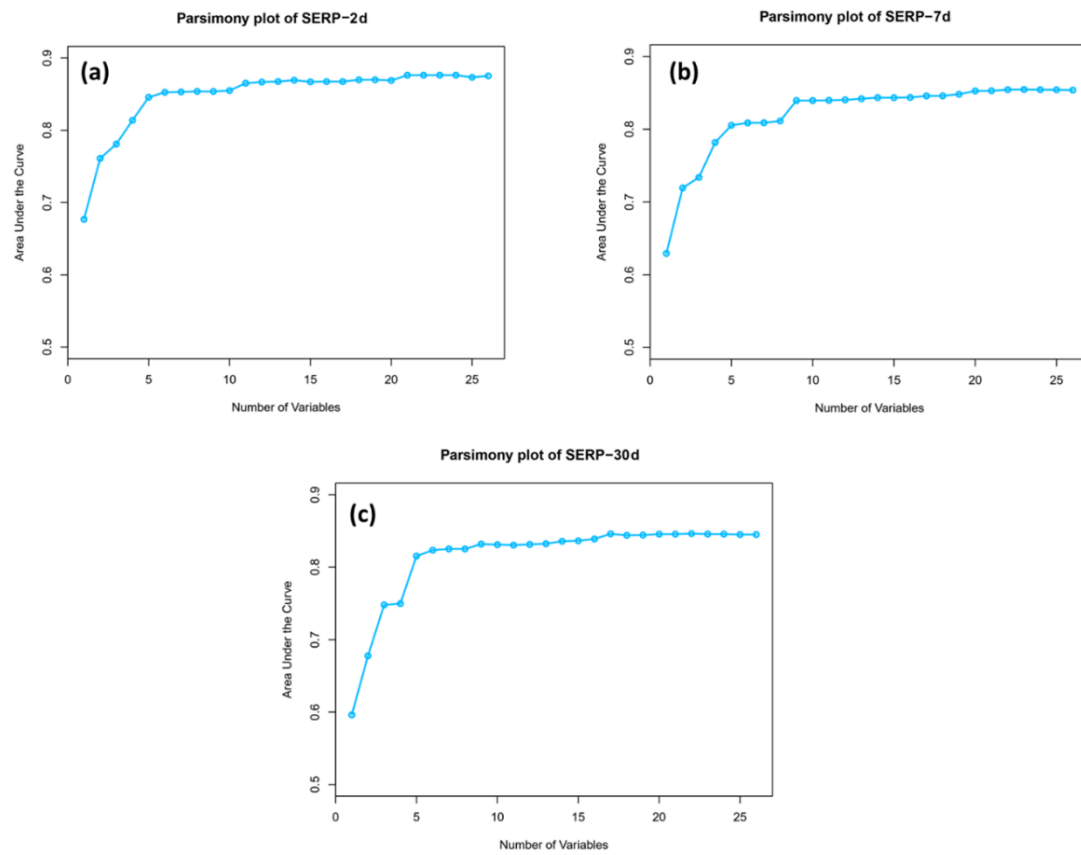

**eFigure 3.** Number of Cases Versus Score Value on the Testing Cohort for (A) SERP-2d and (B) SERP-30d

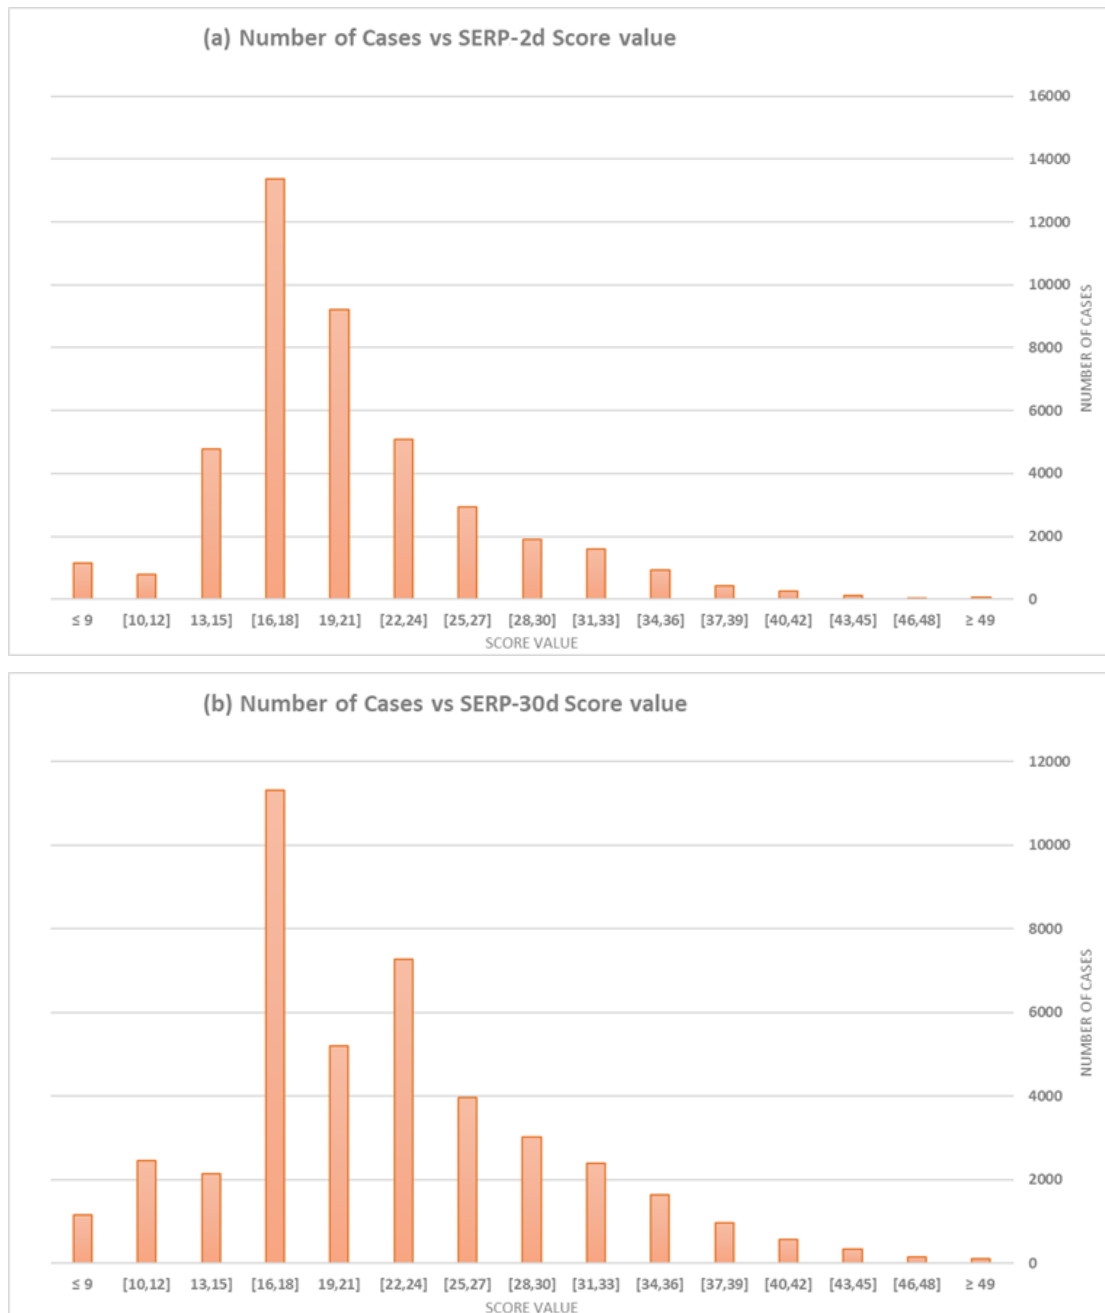

**eFigure 4.** Observed Mortality Rate Versus Score Value on the Testing Cohort for (A) SERP-2d and (B) SERP-30d

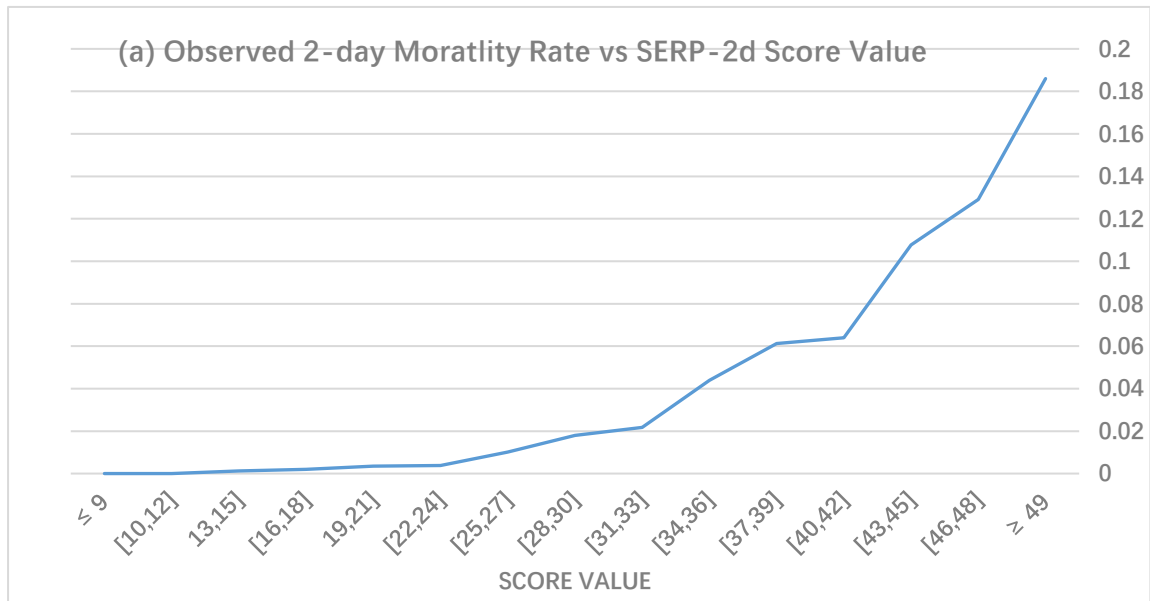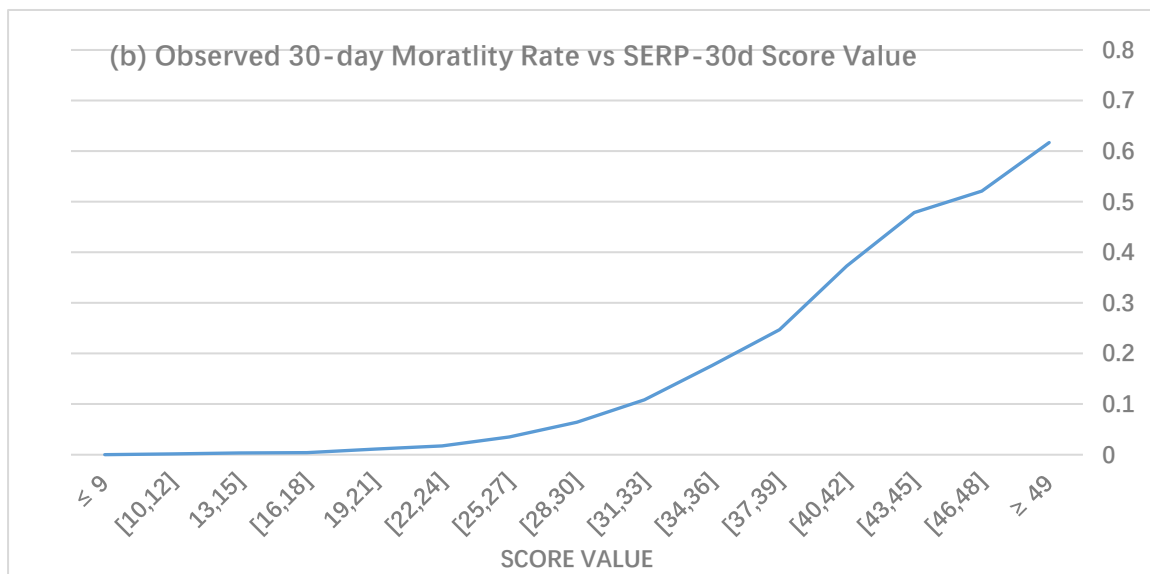

## **eMethods.** Description of the AutoScore Method

Clinical risk-scoring models have been traditionally developed in 2 ways: through expert opinions/consensus and conventional cohort studies. However, both approaches are labor-intensive and are not easy to update over time. In order to develop a parsimonious model with easy access to validation in the context of EHRs, we used AutoScore, a generic method and novel framework to automate the development of a clinical scoring model for predefined outcomes. In this study, 3 SERP scores, namely SERP-2d, SERP-7d and SERP-30d, were developed using 3 primary outcomes of interest: 2-, 7-, and 30-day mortality, respectively.

AutoScore consists of six modules (eFigure 1): Module 1: variable ranking with machine learning, Module 2: variable transformation, Module 3: score derivation, Module 4: model selection, Module 5: domain knowledge-based score fine-tuning, and Module 6: performance evaluation. The details are described in the publication (<http://dx.doi.org/10.2196/21798>). Users (clinicians or scientists) could seamlessly generate parsimonious sparse-score risk models (i.e., risk scores), which can be easily implemented and validated in clinical practice. Also, it enables users to build transparent and straightforward clinical scores quickly. We hope to see its application in various medical case studies.

Following the flow of the AutoScore, the training cohorts initially went through the AutoScore algorithm, where the candidate variables were ranked in Module 1; continuous variables were discretized in Module 2; different categories were weighted in Module 3, and the candidate SERP scoring model was created.

Second, the number of variables was decided by the parsimony plot (i.e., model performance vs. complexity) (Module 4) based on the validation cohort. The parsimonious models would be selected while maximizing predictive accuracy.

Furthermore, the automatically generated cut-off values of each continuous variable can be fine-tuned by combining, rounding and adjusting according to the standard clinical norm. (Module 5)

Lastly, we confirmed the variables and fine-tuned cutoffs. Then Modules 2 and 3 would be re-run to generate the final SERP model. The performance final SERP model will be evaluated in Module 6.
